# Supplementary material for: Electrospun Graphene Nanosheet-Filled Poly(trimethylene terephthalate) Composite Fibers: Effects of the Graphene Nanosheet Content on Morphologies, Electrical Conductivity, Crystallization Behavior, and Mechanical Properties
Source: MDPI journal article supplement (doi:10.3390/polym11010164), 2019-01-17
Supplement: s1 [file s1]

**Supplementary Material**

**Electrospun graphene nanosheet-filled poly(trimethylene terephthalate) composite fibers: effects of the graphene nanosheet content on morphologies, electrical conductivity, crystallization behavior, and mechanical properties**

Chien-Lin Huang\*<sup>1</sup>, Hsuan-Hua Wu<sup>1</sup>, Yung-Ching Jeng, and Wei-Zhi Liang<sup>1</sup>

<sup>1</sup>Department of Fiber and Composite Materials, Feng Chia University, Taichung 40724, Taiwan.

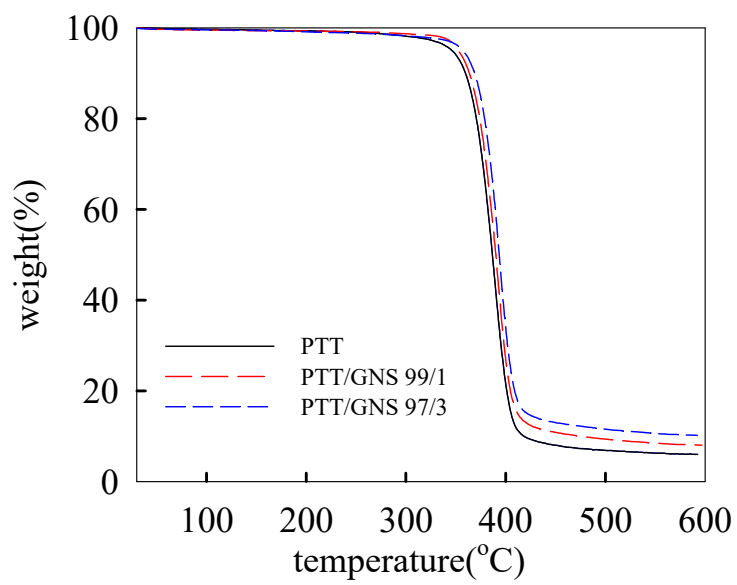

**Figure S1.** thermo-gravimetric analysis curves of the PTT/GNS CFMs.

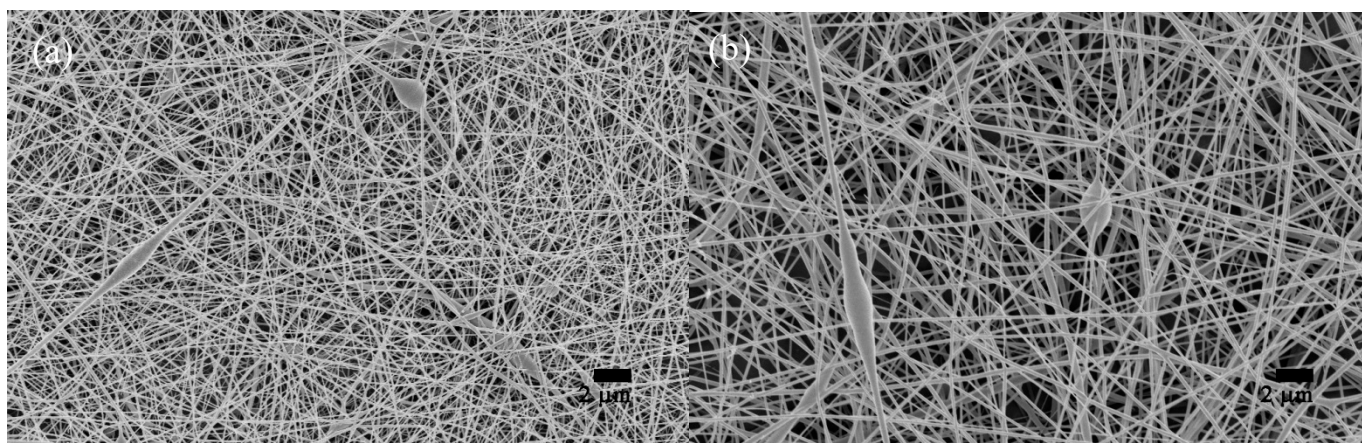

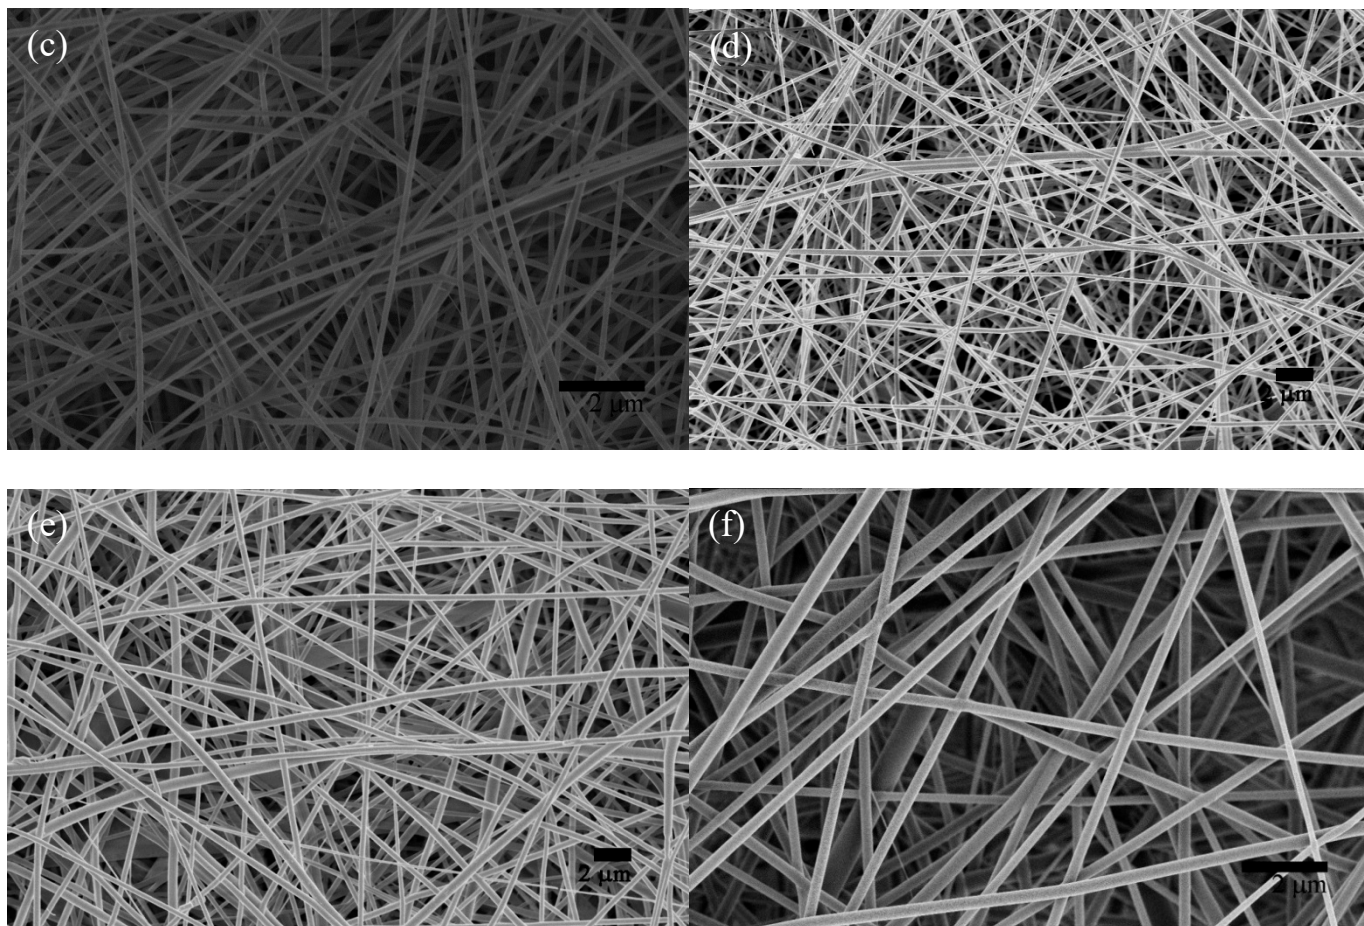

**Figure S2.** SEM images of electrospun fibers from (a) 7 wt% PTT/TFA solution, (b) 8 wt% PTT/TFA solution, (c) 9 wt% PTT/TFA solution, (d) 11 wt% PTT/TFA solution, (e) 12wt% PTT/TFA solution, and (f) 14 wt% PTT/TFA solution.

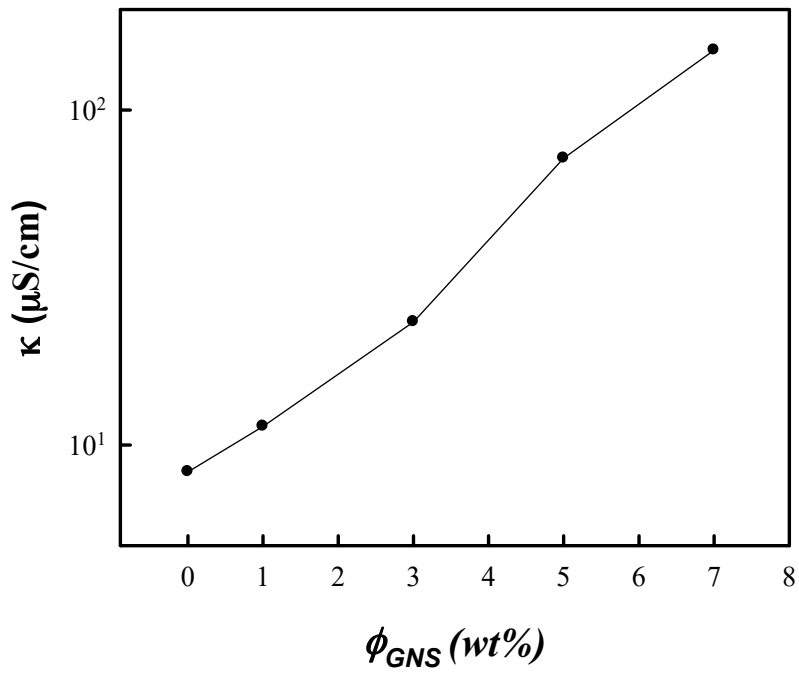

**Figure S3.** Effects of GNS concentration on PTT solution conductivity at 25 °C.

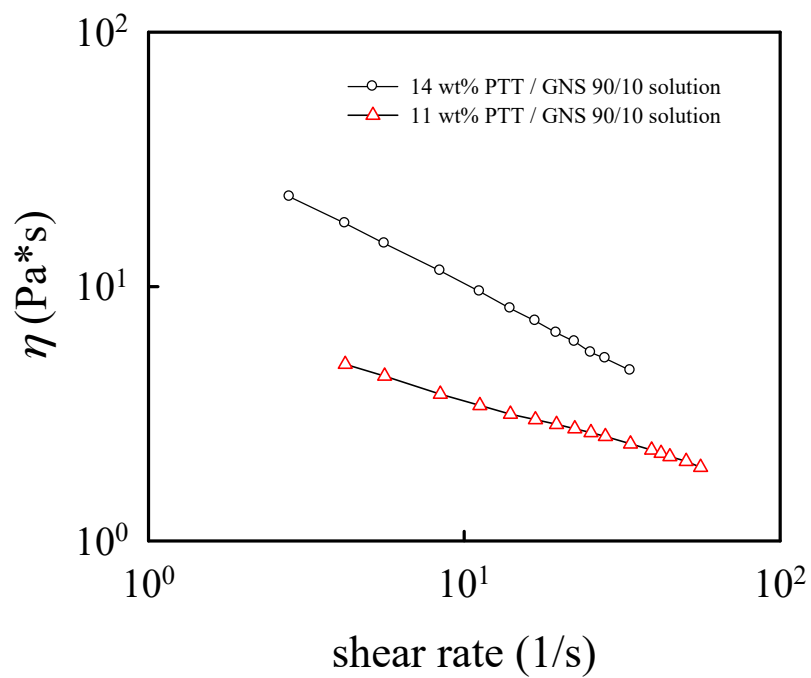

**Figure S4.** Effects of PTT/TFA concentration with 10 wt% GNS content on solution viscosity.

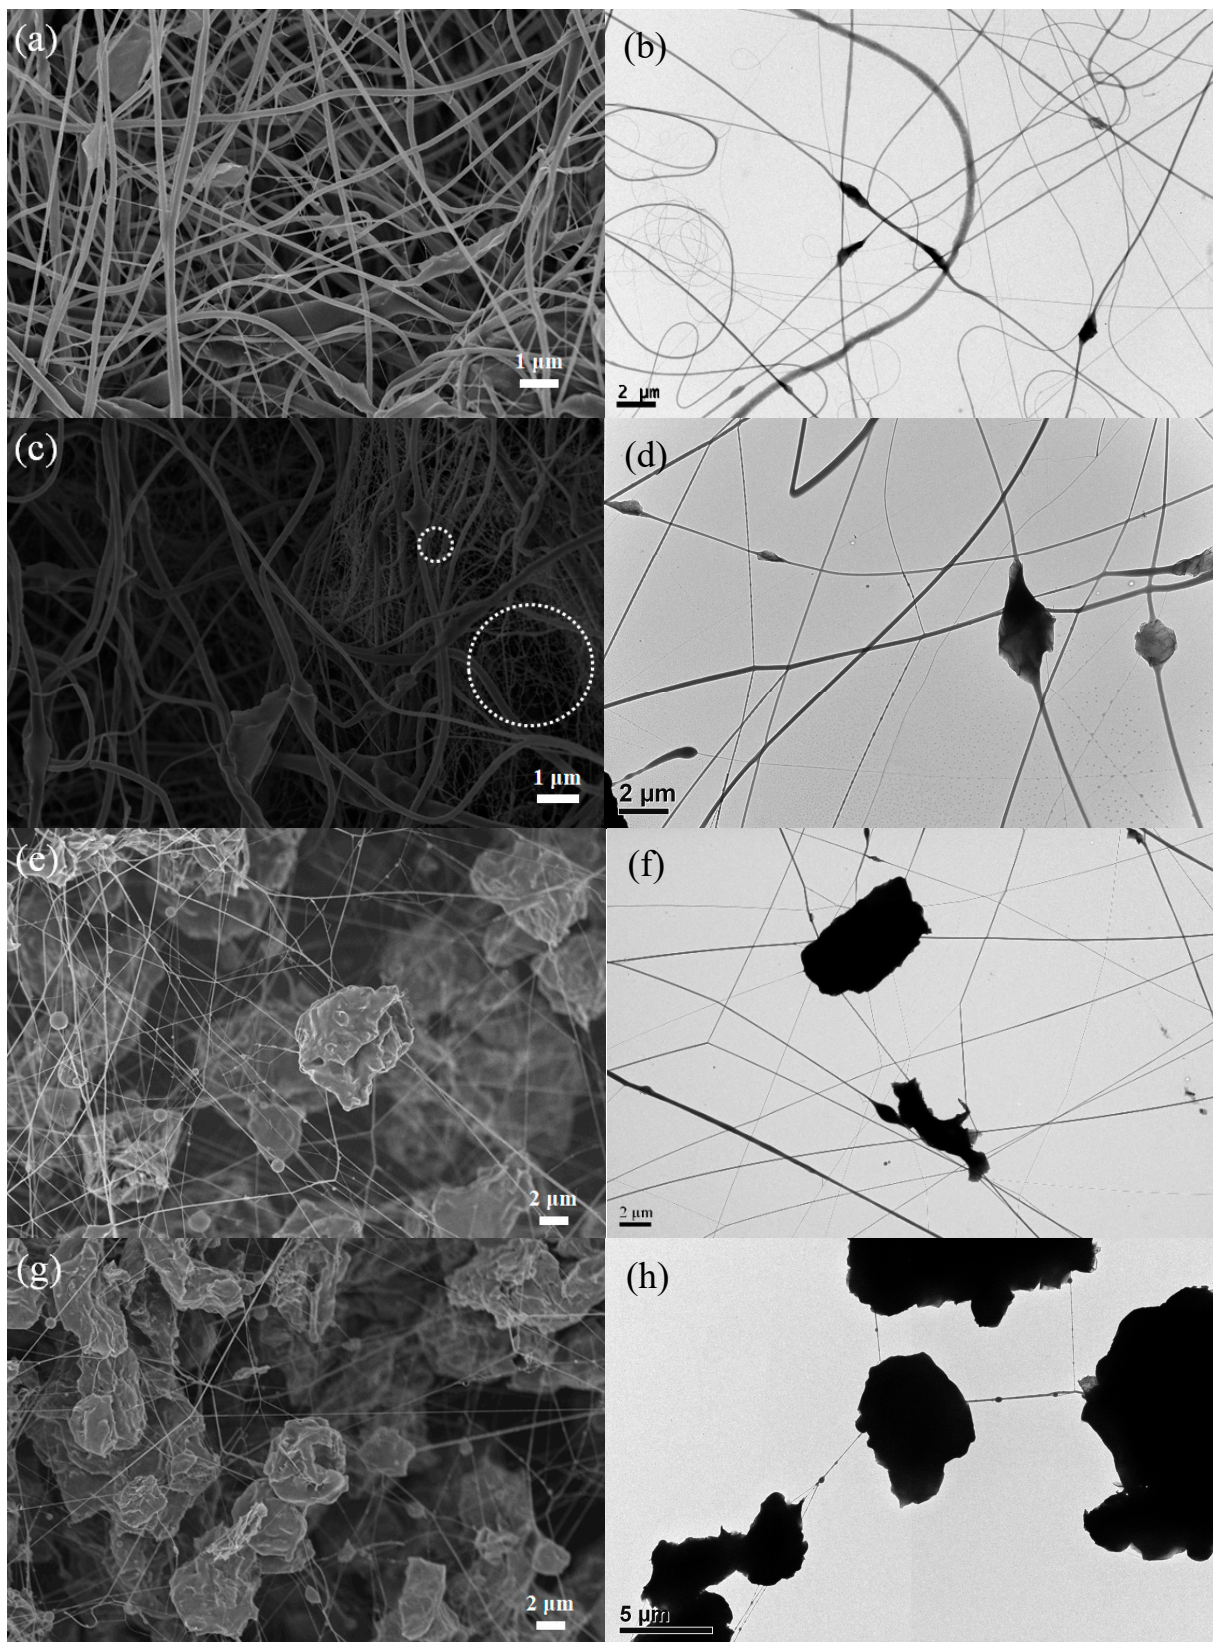

**Figure S5.** SEM and TEM images of electrospun PTT fibers filled with: (a), (b) 10 wt%, (c), (d) 12 wt%, (e), (f) 14 wt%, and (g), (h) 16 wt% GNS.

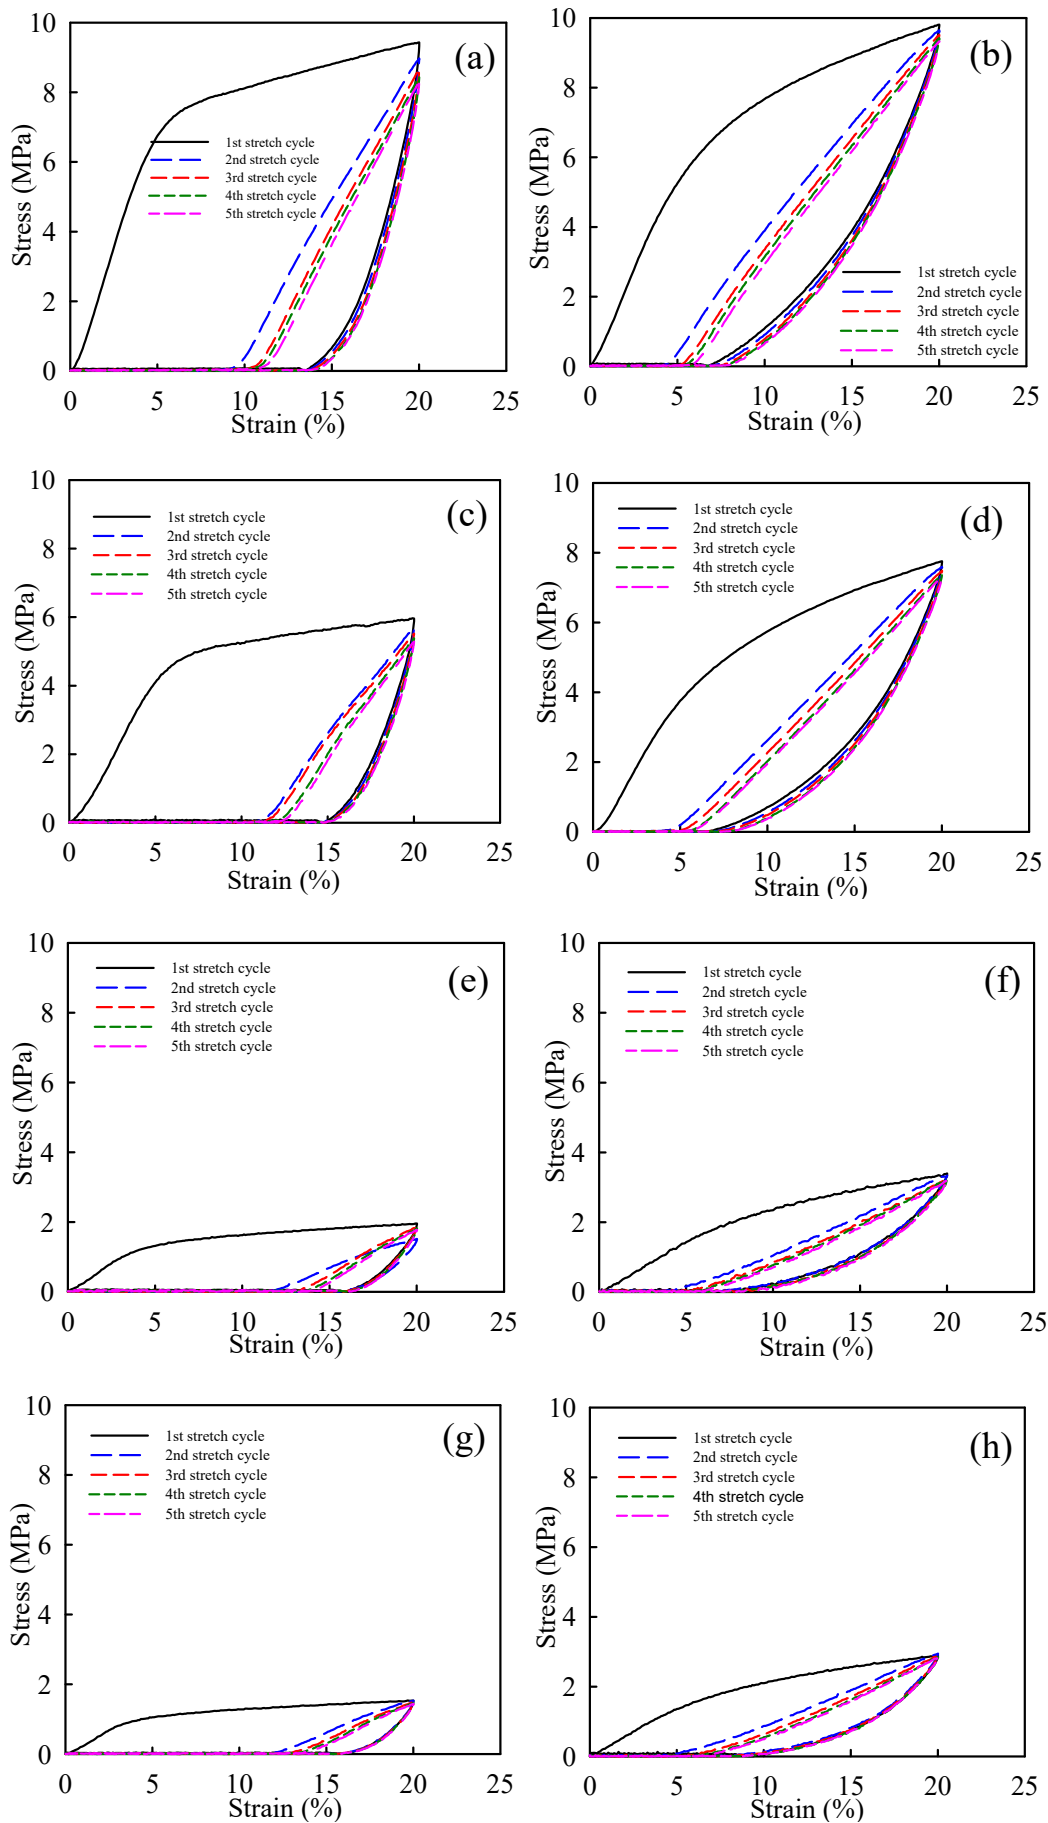

**Figure S6.** Elastic recovery of the (a) neat PTT CFMs, (b) neat PTT CFMs with annealing at 170 °C, (c) PTT/GNS 99/1 CFMs, (d) PTT/GNS 99/1 CFMs with annealing at 170 °C, (e) PTT/GNS 97/3 CFMs, (f) PTT/GNS 97/3 CFMs with annealing at 170 °C, (g) PTT/GNS 95/5 CFMs, and (h) PTT/GNS 95/5 CFMs with annealing at 170 °C during five cycles of loading–unloading with an elongation of 20%.
